# Supplementary material
Source: PubMed Central journal article supplement (PMC8049589)
Supplement: mmc1.pdf [file mmc1.pdf]

# THE LANCET

## Global Health

### Supplementary appendix

This appendix formed part of the original submission. We post it as supplied by the authors.

Supplement to: Shrotri M, Swinnen T, Kampmann B, Parker EPK. An interactive website tracking COVID-19 vaccine development. *Lancet Glob Health* 2021; published online March 2. [http://dx.doi.org/10.1016/S2214-109X\(21\)00043-7](http://dx.doi.org/10.1016/S2214-109X(21)00043-7).

## Appendix: An interactive website tracking COVID-19 vaccine development

Madhumita Shrotri<sup>1</sup>, Tui Swinnen<sup>2</sup>, Beate Kampmann<sup>2,3</sup>, Edward P. K. Parker<sup>2</sup>

<sup>1</sup> Institute of Health Informatics, University College London, London, UK

<sup>2</sup> The Vaccine Centre, London School of Hygiene & Tropical Medicine, London, UK

<sup>3</sup> Vaccines & Immunity Theme, MRC Unit The Gambia at the London School of Hygiene & Tropical Medicine, Banjul, The Gambia

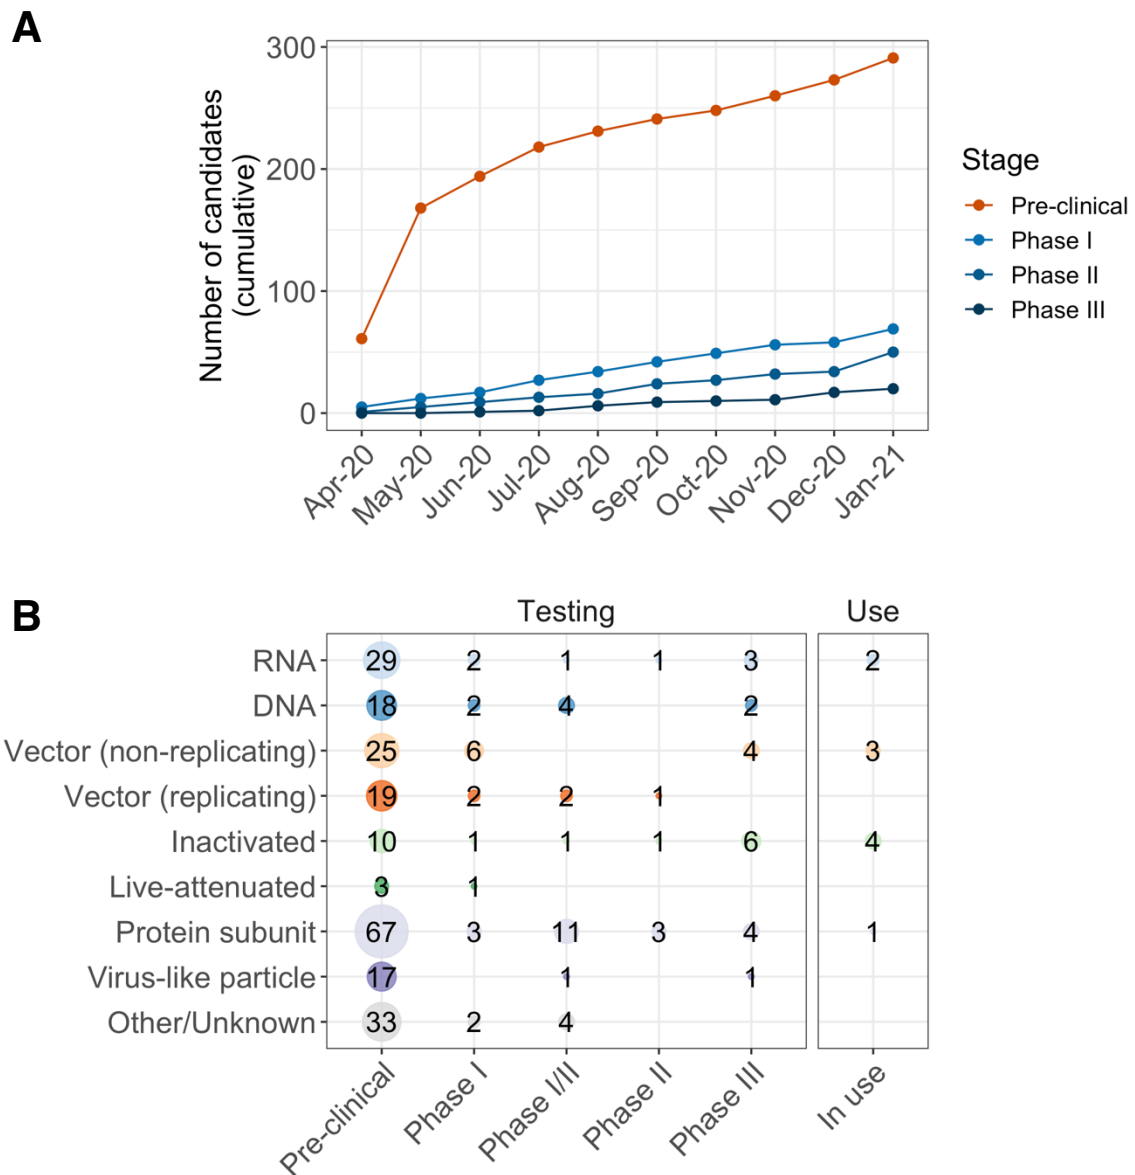

**Figure.** The COVID-19 vaccine landscape. (A) Vaccine development between April 2020 and January 2021. (B) Vaccine candidates by platform and development phase as of Jan 26, 2021. Phase II/III studies are grouped with phase III.
